# Supplementary material for: Drosophila suzukii Susceptibility to the Oral Administration of Bacillus thuringiensis, Xenorhabdus nematophila and Its Secondary Metabolites
Source: MDPI journal article supplement (doi:10.3390/insects12070635), 2021-07-13
Supplement: s1 [file s1]

# SUPPLEMENTARY MATERIAL

**Table SM1.** Statistical results of Xn assay (Fig. 1). Pairwise comparisons of SWD mortality by Tukey test between different Xn concentrations at 24 and 48 h (A), and between different times within the same Xn concentration (expressed as CFU/ml) (B). Significant p values ( $p < 0.05$ ) are indicated in bold italic and highlighted in yellow colour. C: control.

| A) Comparisons between different Xn concentrations at the same time     |                                  |         |         |                 |                                  |         |         |
|-------------------------------------------------------------------------|----------------------------------|---------|---------|-----------------|----------------------------------|---------|---------|
| Time                                                                    | Concentration                    | Q-value | p-value | Time            | Concentration                    | Q-value | p-value |
| 24h                                                                     | C-10 <sup>5</sup>                | 0.93    | 0.998   | 48h             | C-10 <sup>5</sup>                | 0.93    | 0.998   |
|                                                                         | C-10 <sup>7</sup>                | 6.33    | 0.002   |                 | C-10 <sup>7</sup>                | 9.91    | 0.0001  |
|                                                                         | C-10 <sup>9</sup>                | 14.62   | 0.0001  |                 | C-10 <sup>9</sup>                | 19.17   | 0.0001  |
|                                                                         | 10 <sup>5</sup> -10 <sup>7</sup> | 5.40    | 0.010   |                 | 10 <sup>5</sup> -10 <sup>7</sup> | 8.98    | 0.0001  |
|                                                                         | 10 <sup>5</sup> -10 <sup>9</sup> | 13.69   | 0.0001  |                 | 10 <sup>5</sup> -10 <sup>9</sup> | 18.24   | 0.0001  |
|                                                                         | 10 <sup>7</sup> -10 <sup>9</sup> | 8.29    | 0.0001  |                 | 10 <sup>7</sup> -10 <sup>9</sup> | 9.26    | 0.0001  |
| B) Comparisons between different times within the same Xn concentration |                                  |         |         |                 |                                  |         |         |
| Concentration                                                           | Time                             | Q-value | p-value | Concentration   | Time                             | Q-value | p-value |
| C                                                                       | 24h-48h                          | 0.93    | 0.998   | 10 <sup>7</sup> | 24h-48h                          | 4.50    | 0.052   |
| 10 <sup>5</sup>                                                         |                                  | 0.93    | 0.998   | 10 <sup>9</sup> |                                  | 5.48    | 0.009   |

**Table SM2.** Statistical results of bioinsecticides administration assays (both single - Fig. 2 - and combined - Fig. 3 - treatments). Pairwise comparisons of SWD mortality by Tukey test between different times within the same treatment (A) and between different treatments at 16, 24, 32 and 48 h (B). Significant p values ( $p < 0.05$ ) are indicated in bold italic and highlighted in yellow colour. Bt: *Bacillus thuringiensis*; Xn: *Xenorhabdus nematophila*; Sec: *X. nematophila* secretion; C: control

| A) Comparisons between different times within the same treatment |         |         |                        |                       |         |         |                        |
|------------------------------------------------------------------|---------|---------|------------------------|-----------------------|---------|---------|------------------------|
| Treatment                                                        | Time    | Q-value | p-value                | Treatment             | Time    | Q-value | p-value                |
| Bt                                                               | C-16h   | 11.30   | <b><i>3.08E-05</i></b> | Bt/Xn <sub>t0</sub>   | C-16h   | 21.03   | <b><i>3.08E-05</i></b> |
|                                                                  | C-24h   | 14.97   | <b><i>3.08E-05</i></b> |                       | C-24h   | 21.84   | <b><i>3.08E-05</i></b> |
|                                                                  | C-32h   | 16.70   | <b><i>3.08E-05</i></b> |                       | C-32h   | 22.04   | <b><i>3.08E-05</i></b> |
|                                                                  | C-48h   | 19.02   | <b><i>3.08E-05</i></b> |                       | C-48h   | 22.25   | <b><i>3.08E-05</i></b> |
|                                                                  | 16h-24h | 3.67    | 0.769                  |                       | 16h-24h | 0.81    | 1                      |
|                                                                  | 16h-32h | 5.41    | <b><i>0.048</i></b>    |                       | 16h-32h | 1.01    | 1                      |
|                                                                  | 16h-48h | 7.72    | <b><i>5.33E-05</i></b> |                       | 16h-48h | 1.22    | 1                      |
|                                                                  | 24h-32h | 1.73    | 1                      |                       | 24h-32h | 0.20    | 1                      |
|                                                                  | 24h-48h | 4.05    | 0.554                  |                       | 24h-48h | 0.41    | 1                      |
|                                                                  | 32h-48h | 2.32    | 1                      |                       | 32h-48h | 0.20    | 1                      |
| Xn                                                               | C-16h   | 8.10    | <b><i>3.53E-05</i></b> | Bt/Sec <sub>t0</sub>  | C-16h   | 17.20   | <b><i>3.08E-05</i></b> |
|                                                                  | C-24h   | 10.51   | <b><i>3.08E-05</i></b> |                       | C-24h   | 25.50   | <b><i>3.08E-05</i></b> |
|                                                                  | C-32h   | 13.41   | <b><i>3.08E-05</i></b> |                       | C-32h   | 33.32   | <b><i>3.08E-05</i></b> |
|                                                                  | C-48h   | 15.57   | <b><i>3.08E-05</i></b> |                       | C-48h   | -       | -                      |
|                                                                  | 16h-24h | 2.41    | 0.999                  |                       | 16h-24h | 8.30    | <b><i>3.26E-05</i></b> |
|                                                                  | 16h-32h | 5.31    | 0.060                  |                       | 16h-32h | 16.13   | <b><i>3.08E-05</i></b> |
|                                                                  | 16h-48h | 7.47    | <b><i>9.42E-05</i></b> |                       | 16h-48h | -       | -                      |
|                                                                  | 24h-32h | 2.91    | 0.983                  |                       | 24h-32h | 7.83    | <b><i>4.54E-05</i></b> |
|                                                                  | 24h-48h | 5.06    | 0.107                  |                       | 24h-48h | -       | -                      |
|                                                                  | 32h-48h | 2.15    | 1                      |                       | 32h-48h | -       | -                      |
| Sec                                                              | C-16h   | 3.76    | 0.722                  | Bt/Xn <sub>t16</sub>  | C-16h   | 10.21   | <b><i>3.08E-05</i></b> |
|                                                                  | C-24h   | 8.13    | <b><i>3.48E-05</i></b> |                       | C-24h   | 12.88   | <b><i>3.08E-05</i></b> |
|                                                                  | C-32h   | 10.83   | <b><i>3.08E-05</i></b> |                       | C-32h   | 18.75   | <b><i>3.08E-05</i></b> |
|                                                                  | C-48h   | 11.42   | <b><i>3.08E-05</i></b> |                       | C-48h   | 23.11   | <b><i>3.08E-05</i></b> |
|                                                                  | 16h-24h | 4.36    | 0.374                  |                       | 16h-24h | 2.67    | 0.996                  |
|                                                                  | 16h-32h | 7.07    | <b><i>0.0003</i></b>   |                       | 16h-32h | 8.54    | <b><i>3.14E-05</i></b> |
|                                                                  | 16h-48h | 7.66    | <b><i>5.97E-05</i></b> |                       | 16h-48h | 12.90   | <b><i>3.08E-05</i></b> |
|                                                                  | 24h-32h | 2.70    | 0.995                  |                       | 24h-32h | 5.87    | <b><i>0.014</i></b>    |
|                                                                  | 24h-48h | 3.30    | 0.917                  |                       | 24h-48h | 10.23   | <b><i>3.08E-05</i></b> |
|                                                                  | 32h-48h | 0.59    | 1                      |                       | 32h-48h | 4.36    | 0.375                  |
|                                                                  |         |         |                        | Bt/Sec <sub>t16</sub> | C-16h   | 9.38    | <b><i>3.08E-05</i></b> |
|                                                                  |         |         |                        |                       | C-24h   | 14.42   | <b><i>3.08E-05</i></b> |
|                                                                  |         |         |                        |                       | C-32h   | 22.72   | <b><i>3.08E-05</i></b> |
|                                                                  |         |         |                        |                       | C-48h   | 24.97   | <b><i>3.08E-05</i></b> |
|                                                                  |         |         |                        |                       | 16h-24h | 5.04    | 0.111                  |
|                                                                  |         |         |                        |                       | 16h-32h | 13.35   | <b><i>3.08E-05</i></b> |
|                                                                  |         |         |                        |                       | 16h-48h | 15.59   | <b><i>3.08E-05</i></b> |
|                                                                  |         |         |                        |                       | 24h-32h | 8.31    | <b><i>3.26E-05</i></b> |
|                                                                  |         |         |                        |                       | 24h-48h | 10.55   | <b><i>3.08E-05</i></b> |
|                                                                  |         |         |                        |                       | 32h-48h | 2.25    | 1                      |

| B) Comparisons between different treatments at the same time |                      |         |          |      |                      |         |          |
|--------------------------------------------------------------|----------------------|---------|----------|------|----------------------|---------|----------|
| Time                                                         | Treatment            | Q-value | p-value  | Time | Treatment            | Q-value | p-value  |
| 16h                                                          | Bt-Xn                | 0.66    | 1        | 32h  | Bt-Xn                | 0.56    | 1        |
|                                                              | Bt-Sec               | 5.82    | 0.016    |      | Bt-Sec               | 4.15    | 0.493    |
|                                                              | Bt-Bt/Xn_t0          | 9.73    | 3.08E-05 |      | Bt-Bt/Xn_t0          | 5.34    | 0.056    |
|                                                              | Bt-Bt/Xn_t16         | 0.22    | 1        |      | Bt-Bt/Xn_t16         | 2.91    | 0.983    |
|                                                              | Bt-Bt/Sec_t0         | 6.76    | 0.0009   |      | Bt-Bt/Sec_t0         | 17.48   | 3.08E-05 |
|                                                              | Bt-Bt/Sec_t16        | 0.20    | 1        |      | Bt-Bt/Sec_t16        | 7.74    | 5.20E-05 |
|                                                              | Xn-Sec               | 6.47    | 0.002    |      | Xn-Sec               | 4.72    | 0.210    |
|                                                              | Xn-Bt/Xn_t0          | 9.08    | 3.08E-05 |      | Xn-Bt/Xn_t0          | 4.78    | 0.188    |
|                                                              | Xn-Bt/Xn_t16         | 0.88    | 1        |      | Xn-Bt/Xn_t16         | 2.34    | 1.000    |
|                                                              | Xn-Bt/Sec_t0         | 6.10    | 0.007    |      | Xn-Bt/Sec_t0         | 16.92   | 3.08E-05 |
|                                                              | Xn-Bt/Sec_t16        | 0.86    | 1        |      | Xn-Bt/Sec_t16        | 7.17    | 0.0002   |
|                                                              | Sec-Bt/Xn_t0         | 15.55   | 3.08E-05 |      | Sec-Bt/Xn_t0         | 9.49    | 3.08E-05 |
|                                                              | Sec-Bt/Xn_t16        | 5.59    | 0.030    |      | Sec-Bt/Xn_t16        | 7.06    | 0.0003   |
|                                                              | Sec-Bt/Sec_t0        | 12.57   | 3.08E-05 |      | Sec-Bt/Sec_t0        | 21.63   | 3.08E-05 |
|                                                              | Sec-Bt/Sec_t16       | 5.61    | 0.028    |      | Sec-Bt/Sec_t16       | 11.89   | 3.08E-05 |
|                                                              | Bt/Xn_t0-Bt/Xn_t16   | 9.96    | 3.08E-05 |      | Bt/Xn_t0-Bt/Xn_t16   | 2.43    | 0.999    |
|                                                              | Bt/Xn_t0-Bt/Sec_t0   | 2.97    | 0.9769   |      | Bt/Xn_t0-Bt/Sec_t0   | 12.14   | 3.08E-05 |
|                                                              | Bt/Xn_t0-Bt/Sec_t16  | 9.94    | 3.08E-05 |      | Bt/Xn_t0-Bt/Sec_t16  | 2.40    | 0.999    |
|                                                              | Bt/Xn_t16-Bt/Sec_t0  | 6.98    | 0.0004   |      | Bt/Xn_t16-Bt/Sec_t0  | 14.57   | 3.08E-05 |
|                                                              | Bt/Xn_t16-Bt/Sec_t16 | 0.02    | 1        |      | Bt/Xn_t16-Bt/Sec_t16 | 4.83    | 0.170    |
|                                                              | Bt/Sec_t0-Bt/Sec_t16 | 6.96    | 0.0005   |      | Bt/Sec_t0-Bt/Sec_t16 | 9.74    | 3.08E-05 |
| 24h                                                          | Bt-Xn                | 0.61    | 1        | 48h  | Bt-Xn                | 0.40    | 1        |
|                                                              | Bt-Sec               | 5.12    | 0.092    |      | Bt-Sec               | 5.88    | 0.014    |
|                                                              | Bt-Bt/Xn_t0          | 6.87    | 0.0006   |      | Bt-Bt/Xn_t0          | 3.23    | 0.935    |
|                                                              | Bt-Bt/Xn_t16         | 1.23    | 1        |      | Bt-Bt/Xn_t16         | 4.95    | 0.134    |
|                                                              | Bt-Bt/Sec_t0         | 11.39   | 3.08E-05 |      | Bt-Bt/Sec_t0         | -       | -        |
|                                                              | Bt-Bt/Sec_t16        | 1.17    | 1        |      | Bt-Bt/Sec_t16        | 7.67    | 5.92E-05 |
|                                                              | Xn-Sec               | 4.52    | 0.297    |      | Xn-Sec               | 6.28    | 0.004    |
|                                                              | Xn-Bt/Xn_t0          | 7.48    | 9.07E-05 |      | Xn-Bt/Xn_t0          | 2.83    | 0.989    |
|                                                              | Xn-Bt/Xn_t16         | 0.62    | 1        |      | Xn-Bt/Xn_t16         | 4.55    | 0.279    |
|                                                              | Xn-Bt/Sec_t0         | 12.00   | 3.08E-05 |      | Xn-Bt/Sec_t0         | -       | -        |
|                                                              | Xn-Bt/Sec_t16        | 1.77    | 1        |      | Xn-Bt/Sec_t16        | 7.27    | 0.0002   |
|                                                              | Sec-Bt/Xn_t0         | 11.99   | 3.08E-05 |      | Sec-Bt/Xn_t0         | 9.10    | 3.08E-05 |
|                                                              | Sec-Bt/Xn_t16        | 3.89    | 0.648    |      | Sec-Bt/Xn_t16        | 10.83   | 3.08E-05 |
|                                                              | Sec-Bt/Sec_t0        | 16.51   | 3.08E-05 |      | Sec-Bt/Sec_t0        | -       | -        |
|                                                              | Sec-Bt/Sec_t16       | 6.29    | 0.004    |      | Sec-Bt/Sec_t16       | 13.54   | 3.08E-05 |
|                                                              | Bt/Xn_t0-Bt/Xn_t16   | 8.10    | 3.53E-05 |      | Bt/Xn_t0-Bt/Xn_t16   | 1.72    | 1        |
|                                                              | Bt/Xn_t0-Bt/Sec_t0   | 4.52    | 0.295    |      | Bt/Xn_t0-Bt/Sec_t0   | -       | -        |
|                                                              | Bt/Xn_t0-Bt/Sec_t16  | 5.71    | 0.022    |      | Bt/Xn_t0-Bt/Sec_t16  | 4.44    | 0.334    |
|                                                              | Bt/Xn_t16-Bt/Sec_t0  | 12.62   | 3.08E-05 |      | Bt/Xn_t16-Bt/Sec_t0  | -       | -        |
|                                                              | Bt/Xn_t16-Bt/Sec_t16 | 2.40    | 0.999    |      | Bt/Xn_t16-Bt/Sec_t16 | 2.72    | 0.994    |
|                                                              | Bt/Sec_t0-Bt/Sec_t16 | 10.22   | 3.08E-05 |      | Bt/Sec_t0-Bt/Sec_t16 | -       | -        |
